# Supplementary material
Source: ML conference proceedings conference paper supplement (https://proceedings.mlr.press/v97/chen19b.html)
Supplement: Supplementary file [file chen19b-supp.pdf]

## A. Supplementary Material

In this supplement, Sections A.1, A.2, A.3 and A.4 contain complete proofs for the results stated in the main text, Section A.5 details the Markov transition kernel that was used in all experiments and Section A.6 contains an in-depth presentation of our empirical results which were summarised at a high level in the main text.

### A.1. Proof of Theorem 1

Note that the performance of greedy algorithms for minimisation of MMD was studied in (De Marchi et al., 2005; Santin & Haasdonk, 2017). Our analysis, and that in (Chen et al., 2018b), differ in several respects from this work - not least in that our arguments do not require the set  $\mathcal{X}$  to be compact.

First, we state and prove a generalisation of Theorem 5 in (Chen et al., 2018b), which quantifies KSD convergence for point sets produced by approximately optimizing over arbitrary subsets of  $\mathcal{X}$ :

**Theorem 5** (Generalized Stein Point Convergence). *Suppose  $k_0$  is a reproducing kernel with  $\int_{\mathcal{X}} k_0(x, \cdot) dP(x) \equiv 0$ . Fix  $n \in \mathbb{N}$ , and, for each  $1 \leq j \leq n$ , any  $\mathcal{Y}_j \subseteq \mathcal{X}$  and any  $h_j$  in the convex hull of  $\{k_0(x, \cdot)\}_{x \in \mathcal{Y}_j}$ . Fix  $\delta > 0$  and, for each  $1 \leq i \leq n$ , fix  $S_i \geq 0$  and  $r_i > 0$ . Any point set  $\{x_i\}_{i=1}^n \subset \mathcal{X}$  satisfying*

$$\frac{k_0(x_j, x_j)}{2} + \sum_{i=1}^{j-1} k_0(x_i, x_j) \leq \frac{\delta}{2} + \frac{S_j^2}{2} + \inf_{x \in \mathcal{Y}_j} \sum_{i=1}^{j-1} k_0(x_i, x) \quad (8)$$

for each  $1 \leq j \leq n$  also satisfies

$$D_{\mathcal{K}_0, P}(\{x_i\}_{i=1}^n) \leq \exp\left(\frac{1}{2} \sum_{j=1}^n \frac{1}{r_j}\right) \sqrt{\frac{\delta}{n} + \frac{1}{n^2} \sum_{i=1}^n (S_i^2 + r_i \|h_i\|_{\mathcal{K}_0}^2)}. \quad (9)$$

*Proof.* Let  $a_n := n^2 D_{\mathcal{K}_0, P}(\{x_i\}_{i=1}^n)^2 = \sum_{i=1}^n \sum_{i'=1}^n k_0(x_i, x_{i'}) = \|\sum_{i=1}^n k_0(x_i, \cdot)\|_{\mathcal{K}_0}^2$ . Then

$$a_n = \sum_{i=1}^n \sum_{i'=1}^n k_0(x_i, x_{i'}) = a_{n-1} + k_0(x_n, x_n) + 2 \sum_{i=1}^{n-1} k_0(x_i, x_n) \leq a_{n-1} + \delta + S_n^2 + 2 \inf_{x \in \mathcal{Y}_n} \sum_{i=1}^{n-1} k_0(x_i, x), \quad (10)$$

where for the final inequality we have used (8) with  $j = n$ . Next, we let  $f_n := \sum_{i=1}^n k_0(x_i, \cdot)$  so that  $\|f_n\|_{\mathcal{K}_0} = \sqrt{a_n}$ . Applying in the first instance the Cauchy-Schwarz inequality, then making use of the arithmetic-geometric inequality<sup>5</sup>, we get:

$$\begin{aligned} 2 \inf_{x \in \mathcal{Y}_n} f_{n-1}(x) &= 2 \inf_{f \in \mathcal{M}_n} \langle f_{n-1}, f \rangle_{\mathcal{K}_0} \leq 2 \langle f_{n-1}, h_n \rangle_{\mathcal{K}_0} \\ &\leq 2 \sqrt{\|f_{n-1}\|_{\mathcal{K}_0}^2 \|h_n\|_{\mathcal{K}_0}^2} = 2 \sqrt{\left(\frac{\|f_{n-1}\|_{\mathcal{K}_0}^2}{r_n}\right) (r_n \|h_n\|_{\mathcal{K}_0}^2)} \\ &\leq r_n \|h_n\|_{\mathcal{K}_0}^2 + \frac{a_{n-1}}{r_n}. \end{aligned} \quad (11)$$

Combining (10) and (11) establishes the recurrence relation

$$a_n \leq \left(1 + \frac{1}{r_n}\right) a_{n-1} + \delta + S_n^2 + r_n \|h_n\|_{\mathcal{K}_0}^2. \quad (12)$$

Expanding the recurrence leads to a product of terms of the form  $(1 + \frac{1}{r_n})$  which must be controlled. To this end, we use the fact that  $\log(1+x) \leq x$  for  $x \geq 0$  implies that

$$\log \prod_{j=1}^n \left(1 + \frac{1}{r_j}\right) = \sum_{j=1}^n \log \left(1 + \frac{1}{r_j}\right) \leq \sum_{j=1}^n \frac{1}{r_j},$$

<sup>5</sup>Recall that the arithmetic-geometric mean inequality states that for any constants  $b_1, \dots, b_m \geq 0$ ,  $\frac{1}{m} \sum_{k=1}^m b_k \geq (\prod_{k=1}^m b_k)^{\frac{1}{m}}$ .

and, noting that the function  $i \mapsto \prod_{j=1}^i (1 + 1/r_{n-j+1})$  is increasing, we can bound the product

$$\prod_{j=1}^i \left(1 + \frac{1}{r_{n-j+1}}\right) \leq \prod_{j=1}^n \left(1 + \frac{1}{r_j}\right) \leq \exp\left(\sum_{j=1}^n \frac{1}{r_j}\right),$$

uniformly in  $i$ . This implies that the recurrence relation in (12) satisfies

$$\begin{aligned} a_n &\leq \sum_{i=0}^{n-1} (\delta + S_{n-i}^2 + r_{n-i} \|h_{n-i}\|_{\mathcal{K}_0}^2) \prod_{j=1}^i \left(1 + \frac{1}{r_{n-j+1}}\right) \\ &\leq \exp\left(\sum_{j=1}^n \frac{1}{r_j}\right) \sum_{i=0}^{n-1} (\delta + S_{n-i}^2 + r_{n-i} \|h_{n-i}\|_{\mathcal{K}_0}^2), \end{aligned}$$

from which the result is established.  $\square$

Theorem 5 is a refinement of the argument used in the first part of the proof of Theorem 5 in (Chen et al., 2018b). It serves to make explicit the roles of  $S_j$  and  $\|h_j\|_{\mathcal{K}_0}$  and distinguishes between the content of (9) and subsequent assumptions on  $k_0$  and  $P$  that are used to bound the terms that are involved.

The result of Theorem 5 provides an upper bound in the situation where the sets  $\mathcal{Y}_j$  are fixed. To make use of Theorem 5 in the context of SP-MCMC, where the sets  $\mathcal{Y}_j$  are instead randomly generated, we must therefore establish probabilistic bounds on the quantities  $S_i$  and  $\|h_i\|_{\mathcal{K}_0}$  that appear in the statement of Theorem 5. This is the content of the next result:

**Theorem 6** (Generalized i.i.d. SP-MCMC Convergence). *Suppose  $k_0$  is a reproducing kernel with  $\int_{\mathcal{X}} k_0(x, \cdot) dP(x) \equiv 0$  and  $\mathbb{E}_{Z \sim P}[e^{\gamma k_0(Z, Z)}] < \infty$ . Fix a sequence  $(m_j)_{j=1}^n \subset \mathbb{N}$  and, for each  $j \in \mathbb{N}$ , let  $\mathcal{Y}_j$  be the set of independent random variables  $\{Y_{j,l}\}_{l=1}^{m_j}$ , with each  $Y_{j,l} \sim P$ . For each  $1 \leq i \leq n$ , fix  $\tilde{S}_i \geq 0$  and  $r_i > 0$ . Then  $\exists C > 0$  such that*

$$\mathbb{E} [D_{\mathcal{K}_0, P}(\{x_i\}_{i=1}^n)^2] \leq C \exp\left(\sum_{j=1}^n \frac{1}{r_j}\right) \frac{1}{n^2} \sum_{i=1}^n \left(r_i e^{-\frac{\gamma}{2} \tilde{S}_i^2} + \left(1 + \frac{r_i}{m_i}\right) \min\left\{\tilde{S}_i^2, \sup_{x \in \mathcal{X}} k_0(x, x)\right\}\right), \quad (13)$$

where in each case the total expectation  $\mathbb{E}$  is taken over realisations of the random sets  $\mathcal{Y}_j$ ,  $j \in \mathbb{N}$ .

*Proof.* Recall that the  $j$ th iteration of SP-MCMC requires that random variables  $(Y_{j,l})_{l=1}^{m_j}$  are instantiated. Define the set  $\mathcal{Y}_j$  to consist of the subset of these  $m_j$  samples for which  $Y_{j,l} \in B_j := \{x \in \mathcal{X} : k_0(x, x) \leq \tilde{S}_j^2\}$  is satisfied. Note that SP-MCMC selects the  $j$ th point  $x_j$  from the collection  $\{Y_{j,l}\}_{l=1}^{m_j}$  such that

$$\begin{aligned} \frac{k_0(x_j, x_j)}{2} + \sum_{i=1}^{j-1} k_0(x_i, x_j) &= \inf_{x \in \{Y_{j,l} : l=1, \dots, m_j\}} \frac{k_0(x, x)}{2} + \sum_{i=1}^{j-1} k_0(x_i, x) \\ &\leq \inf_{x \in \mathcal{Y}_j} \frac{k_0(x, x)}{2} + \sum_{i=1}^{j-1} k_0(x_i, x) \leq \frac{1}{2} \min\left\{\tilde{S}_j^2, \sup_{x \in \mathcal{X}} k_0(x, x)\right\} + \inf_{x \in \mathcal{Y}_j} \sum_{i=1}^{j-1} k_0(x_i, x). \end{aligned}$$

so that (8) is satisfied with  $\delta = 0$  and  $S_j := \min\left\{\tilde{S}_j, \sup_{x \in \mathcal{X}} k_0(x, x)^{1/2}\right\}$ .

Let  $h_j(\cdot) := \frac{1}{m_j} \sum_{l=1}^{m_j} k_0(Y_{j,l}, \cdot) \mathbb{I}[Y_{j,l} \in B_j]$ , which is an element of the convex hull of  $\{k_0(x, \cdot)\}_{x \in \mathcal{Y}_j}$ . Define also the truncated kernel mean embeddings

$$k_j^-(\cdot) := \int k_0(x, \cdot) \mathbb{I}[x \in B_j] dP(x), \quad k_j^+(\cdot) := \int k_0(x, \cdot) \mathbb{I}[x \notin B_j] dP(x).$$

From the triangle inequality followed by Jensen's inequality

$$\|h_j\|_{\mathcal{K}_0}^2 \leq 2 (\|k_j^-\|_{\mathcal{K}_0}^2 + \|h_j - k_j^-\|_{\mathcal{K}_0}^2). \quad (14)$$

In what follows we aim to bound the two terms on the right hand side of (14).

**Bound on  $\|k_j^-\|_{\mathcal{K}_0}^2$ :** For the first term in (14), since  $\int_{\mathcal{X}} k_0(x, \cdot) dP(x) \equiv 0$  we have  $k_j^+ = -k_j^-$ . Thus, we deduce that

$$\begin{aligned} \|k_j^-\|_{\mathcal{K}_0}^2 &= \|k_j^+\|_{\mathcal{K}_0}^2 = \iint k_0(x, y) \mathbb{I}[x \notin B_j] dP(x) \mathbb{I}[y \notin B_j] dP(y) \\ &\leq \left( \int \sqrt{k_0(x, x)} \mathbb{I}[x \notin B_j] dP(x) \right)^2 \leq \int k_0(x, x) \mathbb{I}[x \notin B_j] dP(x) \end{aligned}$$

where the final two inequalities follow by Cauchy-Schwarz and Jensen's inequality. Now, let  $Y = k_0(Z, Z)$  for  $Z \sim P$  and  $b := \mathbb{E}[e^{\gamma Y}] < \infty$ . Following Appendix A.1.3 of (Chen et al., 2018b), we will bound the tail expectation above by considering the biased random variable  $Y^* = k_0(Z^*, Z^*)$  for  $Z^*$  with density

$$\rho(z^*) = \frac{k_0(z^*, z^*) p(z^*)}{\mathbb{E}[Y]}.$$

To this end we have, by the relation  $x \leq e^x$ ,

$$\mathbb{E}[e^{\frac{\gamma}{2} Y^*}] = \mathbb{E}[e^{\frac{\gamma}{2} k_0(Z^*, Z^*)}] = \frac{\mathbb{E}[k_0(Z, Z) e^{\frac{\gamma}{2} k_0(Z, Z)}]}{\mathbb{E}[Y]} = \frac{\mathbb{E}[\frac{\gamma}{2} Y e^{\frac{\gamma}{2} Y}]}{\frac{\gamma}{2} \mathbb{E}[Y]} \leq \frac{\mathbb{E}[e^{\gamma Y}]}{\lambda \mathbb{E}[Y]} = \frac{2b}{\gamma \mathbb{E}[Y]}.$$

From an application of Markov's inequality we see that

$$\mathbb{P}[Y^* \geq \tilde{S}_j^2] = \mathbb{P}[e^{\frac{\gamma}{2} Y^*} \geq e^{\frac{\gamma}{2} \tilde{S}_j^2}] \leq \frac{\mathbb{E}[e^{\frac{\gamma}{2} Y^*}]}{e^{\frac{\gamma}{2} \tilde{S}_j^2}} \leq \frac{2b}{\gamma \mathbb{E}[Y]} e^{-\frac{\gamma}{2} \tilde{S}_j^2}$$

and as a consequence

$$\|k_j^-\|_{\mathcal{K}_0}^2 \leq \int k_0(x, x) \mathbb{I}[k_0(x, x) > \tilde{S}_j^2] dP(x) = \mathbb{E}[Y] \int \mathbb{I}[k_0(x, x) > \tilde{S}_j^2] \rho(x) dx = \mathbb{E}[Y] \mathbb{P}[Y^* \geq \tilde{S}_j^2] \leq \frac{2b}{\gamma} e^{-\frac{\gamma}{2} \tilde{S}_j^2}. \quad (15)$$

**Bound on  $\|h_j - k_j^-\|_{\mathcal{K}_0}^2$ :** For the second term in (14), we have that

$$\begin{aligned} \|h_j - k_j^-\|_{\mathcal{K}_0}^2 &= \frac{1}{m_j^2} \sum_{l, l'=1}^{m_j} k_0(Y_{j,l}, Y_{j,l'}) \mathbb{I}[Y_{j,l}, Y_{j,l'} \in B_j] - \frac{2}{m_j} \sum_{l=1}^{m_j} \int k_0(x, Y_{j,l}) \mathbb{I}[x, Y_{j,l} \in B_j] dP(x) \\ &\quad + \iint k_0(x, x') \mathbb{I}[x, x' \in B_j] dP(x) dP(x') \\ &= \frac{1}{m_j} \sum_{l=1}^{m_j} \left\{ \frac{1}{m_j} \sum_{l'=1}^{m_j} k_0(Y_{j,l}, Y_{j,l'}) \mathbb{I}[Y_{j,l}, Y_{j,l'} \in B_j] - \int k_0(x, Y_{j,l}) \mathbb{I}[x, Y_{j,l} \in B_j] dP(x) \right\} \\ &\quad - \int \left\{ \frac{1}{m_j} \sum_{l=1}^{m_j} k_0(x, Y_{j,l}) \mathbb{I}[x, Y_{j,l} \in B_j] - \int k_0(x, x') \mathbb{I}[x, x' \in B_j] dP(x') \right\} dP(x) \\ &= \frac{1}{m_j^2} \sum_{l=1}^{m_j} \sum_{l'=1}^{m_j} \left\{ h_{Y_{j,l'}}(Y_{j,l}) - \int h_{Y_{j,l}}(x) dP(x) \right\} - \frac{1}{m_j} \sum_{l=1}^{m_j} \int \left\{ h_x(Y_{j,l}) - \int h_x(x') dP(x') \right\} dP(x) \\ &= \frac{1}{m_j^2} \sum_{l=1}^{m_j} \sum_{l'=1}^{m_j} \left\{ h_{Y_{j,l'}}(Y_{j,l}) - \int h_{Y_{j,l'}}(x) dP(x) \right\} - \frac{1}{m_j} \sum_{l=1}^{m_j} \int \left\{ h_x(Y_{j,l}) - \int h_x(x') dP(x') \right\} dP(x) \end{aligned}$$

where  $h_x(x') := k_0(x, x') \mathbb{I}[x, x' \in B_j]$ . Thus, letting again  $Z \sim P$  be independent of all other random variables that we have defined,

$$\mathbb{E}[\|h_j - k_j^-\|_{\mathcal{K}_0}^2] = \frac{1}{m_j^2} \sum_{l=1}^{m_j} \sum_{l'=1}^{m_j} \left\{ \mathbb{E}[h_{Y_{j,l'}}(Y_{j,l})] - \mathbb{E}[h_{Y_{j,l'}}(Z)] \right\} - \frac{1}{m_j} \sum_{l=1}^{m_j} \int \left\{ \mathbb{E}[h_x(Y_{j,l})] - \mathbb{E}[h_x(Z)] \right\} dP(x). \quad (16)$$

Since the  $Y_{j,l}$  are assumed to be independent and distributed according to  $P$ , all of the terms in (16) vanish apart from the diagonal terms in the first sum, and moreover all of the diagonal terms are identical:

$$\mathbb{E} [\|h_j - k_j^-\|_{\mathcal{K}_0}^2] = \frac{1}{m_j^2} \sum_{l=1}^{m_j} \{\mathbb{E}[h_{Y_{j,l}}(Y_{j,l})] - \mathbb{E}[h_{Y_{j,l}}(Z)]\} = \frac{1}{m_j} \{\mathbb{E}[h_{Y_{j,1}}(Y_{j,1})] - \mathbb{E}[h_{Y_{j,1}}(Z)]\}.$$

An application of the triangle inequality and Cauchy-Schwarz leads us to the bound

$$\begin{aligned} |\mathbb{E} [\|h_j - k_j^-\|_{\mathcal{K}_0}^2]| &\leq \frac{1}{m_j} \{|\mathbb{E}[h_{Y_{j,1}}(Y_{j,1})]| + |\mathbb{E}[h_{Y_{j,1}}(Z)]|\} \\ &= \frac{1}{m_j} \{|\mathbb{E}[k_0(Y_{j,1}, Y_{j,1})\mathbb{I}[Y_{j,1} \in B_j]]| + |\mathbb{E}[k_0(Y_{j,1}, Z)\mathbb{I}[Y_{j,1}, Z \in B_j]]|\} \\ &\leq \frac{1}{m_j} \left\{ \mathbb{E}[k_0(Y_{j,1}, Y_{j,1})\mathbb{I}[Y_{j,1} \in B_j]] + \mathbb{E}[k_0(Y_{j,1}, Y_{j,1})^{\frac{1}{2}} k_0(Z, Z)^{\frac{1}{2}} \mathbb{I}[Y_{j,1}, Z \in B_j]] \right\} \\ &\leq \frac{2}{m_j} \min \left\{ \tilde{S}_j^2, \sup_{x \in \mathcal{X}} k_0(x, x) \right\}. \end{aligned}$$

**Overall Bound:** Combining our bounds for the terms in (14) leads to

$$\mathbb{E} [\|h_j\|_{\mathcal{K}_0}^2] \leq 2 (\|k_j^-\|_{\mathcal{K}_0}^2 + \mathbb{E} [\|h_j - k_j^-\|_{\mathcal{K}_0}^2]) \leq \frac{4b}{\gamma} e^{-\frac{\gamma}{2} \tilde{S}_j^2} + \frac{4}{m_j} \min \left\{ \tilde{S}_j^2, \sup_{x \in \mathcal{X}} k_0(x, x) \right\}. \quad (17)$$

Finally, we square the conclusion (9) of Theorem 5 (with, recall,  $\delta = 0$  and  $S_j := \min\{\tilde{S}_j, \sup_{x \in \mathcal{X}} k_0(x, x)^{1/2}\}$ ) and take expectations, which combine with (17) to produce (13) with  $C = \max\left\{\frac{4b}{\gamma}, 4\right\}$ .  $\square$

Now we are in a position to prove Theorem 1, which follows as a specific instance of Theorem 6:

*Proof of Theorem 1.* The result follows as a special case of the general result of Theorem 6 with  $S_i = \sqrt{\frac{2}{\gamma} \log(n \wedge m_i)}$  and  $r_i = n$  for  $i = 1, \dots, n$ . Indeed, with these settings we can bound the conclusion (13) of Theorem 6 as follows (with  $C$  a generic constant):

$$\begin{aligned} \mathbb{E} [D_{\mathcal{K}_0, P}(\{x_i\}_{i=1}^n)^2] &\leq C \exp \left( \sum_{j=1}^n \frac{1}{r_j} \right) \frac{1}{n^2} \sum_{i=1}^n \left( r_i e^{-\frac{\gamma}{2} S_i^2} + \left( 1 + \frac{r_i}{m_i} \right) \min \left\{ S_i^2, \sup_{x \in \mathcal{X}} k_0(x, x) \right\} \right) \\ &= C \frac{1}{n^2} \sum_{i=1}^n \left( \frac{n}{n \wedge m_i} + \left( 1 + \frac{n}{m_i} \right) \min \left\{ \frac{2}{\gamma} \log(n \wedge m_i), \sup_{x \in \mathcal{X}} k_0(x, x) \right\} \right) \\ &\leq C \frac{1}{n} \sum_{i=1}^n \left( \frac{1}{n \wedge m_i} + \frac{1}{n \wedge m_i} \min \left\{ \log(n \wedge m_i), \sup_{x \in \mathcal{X}} k_0(x, x) \right\} \right) \\ &\leq C \frac{1}{n} \sum_{i=1}^n \frac{1}{n \wedge m_i} \min \left\{ \log(n \wedge m_i), \sup_{x \in \mathcal{X}} k_0(x, x) \right\} \end{aligned}$$

as claimed.  $\square$

To conclude this section, we remark that the general result established in Thm. 6 also implies conditions under which Monte Carlo search strategies can be successfully applied to the *Stein Herding* algorithm proposed in (Chen et al., 2018b). However, our focus on the greedy version of SP in this work was motivated by the stronger theoretical guarantees possessed by the greedy method, as well as the superior empirical performance reported in (Chen et al., 2018b).

## A.2. Proof of Theorem 2

Now we turn to the main task of establishing consistency of SP-MCMC in the Markov chain context. Necessarily, any quantitative result must depend on mixing properties of the Markov chain being used. In this research we focused on time-homogeneous Markov chains and the notion of mixing called  $V$ -uniform ergodicity, defined in Sec. 5 of the main text. Recall that, for a function  $V : \mathcal{X} \rightarrow [1, \infty)$ ,  $V$ -uniform ergodicity is the property that

$$\|\mathbb{P}^n(y, \cdot) - P\|_V \leq RV(y)\rho^n$$

for some  $R \in [0, \infty)$  and  $\rho \in (0, 1)$  and for all initial states  $y \in \mathcal{X}$  and all  $n \in \mathbb{N}$ . The assumption of  $V$ -uniform ergodicity enables us to provide results that hold for *any* choice of function `crit` that takes values in  $\mathcal{X}$ . This includes the functions `LAST`, `RAND` and `INFL` from the main text, but in general the value of `crit` ( $\{x_i\}_{i=1}^j$ ) is not restricted to be in  $\{x_i\}_{i=1}^j$  and can be an arbitrary point in  $\mathcal{X}$ . This permits the development of quite general strategies for SP-MCMC, beyond those explicitly considered in the main text.

Armed with the notion of  $V$ -uniform ergodicity, we derive the following general result:

**Theorem 7** (SP-MCMC for  $V$ -Uniformly Ergodic Markov Chains). *Suppose  $\int_{\mathcal{X}} k_0(x, \cdot) dP(x) \equiv 0$  and let  $(m_j)_{j=1}^n \subset \mathbb{N}$  be a fixed sequence. Fix a function  $V : \mathcal{X} \rightarrow [1, \infty)$  and consider time-homogeneous reversible Markov chains  $(Y_{j,l})_{l=1}^{m_j}$ ,  $j \in \mathbb{N}$ , generated using the same  $V$ -uniformly ergodic transition kernel. Suppose  $\exists \gamma > 0$  such that  $b := \mathbb{E}[e^{\gamma k_0(Y, Y)}] < \infty$ . Let  $\{x_i\}_{i=1}^n$  denote the output of SP-MCMC. For each  $1 \leq i \leq n$ , fix  $S_i \geq 0$  and  $r_i > 0$ . Then for some constant  $C$ ,*

$$\mathbb{E} [D_{\mathcal{K}_0, P}(\{x_i\}_{i=1}^n)^2] \leq C \exp \left( \sum_{i=1}^n \frac{1}{r_i} \right) \frac{1}{n^2} \sum_{i=1}^n \left( S_i^2 + r_i e^{-\frac{\gamma}{2} S_i} + V_+(S_i) V_-(S_i) \frac{r_i}{m_i} \right) \quad (18)$$

where in each case the total expectation  $\mathbb{E}$  is taken over realisations of the random sets  $\mathcal{Y}_j = \{Y_{j,l}\}_{l=1}^{m_j}$ ,  $j \in \mathbb{N}$ .

*Proof.* The structure of the proof is initially identical to that used in Theorem 6. Indeed, proceeding as in the proof of Theorem 6 we set up the triangle inequality in (14) and attempt to control both terms in this bound. For the first term we proceed identically to obtain the bound on  $\|k_j^-\|_{\mathcal{K}_0}^2$  in (15). For the second term we proceed identically to obtain the bound

$$\mathbb{E} [\|h_j - k_j^-\|_{\mathcal{K}_0}^2] = \frac{1}{m_j^2} \sum_{l=1}^{m_j} \sum_{l'=1}^{m_j} \left\{ \mathbb{E}[h_{Y_{j,l'}}(Y_{j,l})] - \mathbb{E}[h_{Y_{j,l'}}(Z)] \right\} - \frac{1}{m_j} \sum_{l=1}^{m_j} \int \{ \mathbb{E}[h_x(Y_{j,l})] - \mathbb{E}[h_x(Z)] \} dP(x) \quad (19)$$

from (16), where  $Z \sim P$  is independent of all other random variables that we have defined. However, the subsequent argument in Theorem 6 exploited independence of the random variables  $Y_{j,l}$ , which does not hold in the Markov chain context. Thus our aim in the sequel is to leverage  $V$ -uniform ergodicity to control (19).

For the first term in (19) we exploit the definition of the  $\|\cdot\|_V$  norm and the Cauchy-Schwarz inequality to see that, for each  $l' \geq l$ , we have that

$$\begin{aligned} \left| \mathbb{E}[h_{Y_{j,l'}}(Y_{j,l}) | Y_{j,l'} = y] - \mathbb{E}[h_{Y_{j,l'}}(Z) | Y_{j,l'} = y] \right| &= \left| \mathbb{E}[h_y(Y_{j,l}) | Y_{j,l'} = y] - \mathbb{E}[h_y(Z)] \right| \\ &\leq \|\mathbb{P}^{l'-l}(y, \cdot) - P\|_V \|h_y\|_V \\ &= \|\mathbb{P}^{l'-l}(y, \cdot) - P\|_V \sup_{x \in \mathcal{X}} \frac{|k_0(y, x) \mathbb{I}[x, y \in B_j]|}{V(x)} \\ &\leq \|\mathbb{P}^{l'-l}(y, \cdot) - P\|_V \sup_{x \in \mathcal{X}} \frac{k_0(x, x)^{\frac{1}{2}} k_0(y, y)^{\frac{1}{2}} \mathbb{I}[x, y \in B_j]}{V(x)} \\ &= \|\mathbb{P}^{l'-l}(y, \cdot) - P\|_V k_0(y, y)^{\frac{1}{2}} \mathbb{I}[y \in B_j] \sup_{x \in B_j} \frac{k_0(x, x)^{\frac{1}{2}}}{V(x)}. \quad (20) \end{aligned}$$

At this point we exploit  $V$ -uniform ergodicity to obtain that, for some  $R \in [0, \infty)$  and  $\rho \in (0, 1)$ ,

$$\begin{aligned}
 (20) \quad &\leq RV(y)\rho^{l'-l} \times k_0(y, y)^{\frac{1}{2}} \mathbb{I}[y \in B_j] \times \sup_{x \in B_j} \frac{k_0(x, x)^{\frac{1}{2}}}{V(x)} \\
 &\leq R\rho^{l'-l} \times \sup_{y \in B_j} V(y)k_0(y, y)^{\frac{1}{2}} \times \sup_{x \in B_j} \frac{k_0(x, x)^{\frac{1}{2}}}{V(x)} \\
 &\leq R\rho^{l'-l} \times V_+(S_j)V_-(S_j).
 \end{aligned} \tag{21}$$

Note that from the symmetry  $h_x(x') = h_{x'}(x)$ , together with the fact that the Markov chain is reversible, the above bound holds also for  $l' < l$  if  $l' - l$  is replaced by  $|l' - l|$ . Thus, from Jensen's inequality,

$$\begin{aligned}
 \left| \mathbb{E}[h_{Y_{j,l'}}(Y_{j,l})] - \mathbb{E}[h_{Y_{j,l'}}(Z)] \right| &= \left| \mathbb{E} \left[ \mathbb{E}[h_{Y_{j,l'}}(Y_{j,l})|Y_{j,l'}] - \mathbb{E}[h_{Y_{j,l'}}(Z)|Y_{j,l'}] \right] \right| \\
 &\leq \mathbb{E} \left[ \left| \mathbb{E}[h_{Y_{j,l'}}(Y_{j,l})|Y_{j,l'}] - \mathbb{E}[h_{Y_{j,l'}}(Z)|Y_{j,l'}] \right| \right] \\
 &\leq RV_+(S_j)V_-(S_j)\rho^{|l'-l|}
 \end{aligned}$$

from which it follows that

$$\begin{aligned}
 \left| \frac{1}{m_j^2} \sum_{l=1}^{m_j} \sum_{l'=1}^{m_j} \left\{ \mathbb{E}[h_{Y_{j,l'}}(Y_{j,l})] - \mathbb{E}[h_{Y_{j,l'}}(Z)] \right\} \right| &\leq RV_+(S_j)V_-(S_j) \frac{1}{m_j^2} \sum_{l=1}^{m_j} \sum_{l'=1}^{m_j} \rho^{|l'-l|} \\
 &= RV_+(S_j)V_-(S_j) \left[ \frac{1}{m_j} + \frac{2}{m_j} \sum_{r=1}^{m_j-1} \left( \frac{m_j-r}{m_j} \right) \rho^r \right] \\
 &\leq RV_+(S_j)V_-(S_j) \left[ \frac{1}{m_j} + \frac{2}{m_j} \sum_{r=1}^{\infty} \rho^r \right] \\
 &= RV_+(S_j)V_-(S_j) \left( \frac{1+\rho}{1-\rho} \right) \frac{1}{m_j}.
 \end{aligned}$$

For the second term in (19) we use the same approach as in (21) to obtain that

$$\left| \mathbb{E}[h_x(Y_{j,l})|Y_{j,0} = x_{j-1}] - \mathbb{E}[h_x(Z)|Y_{j,0} = x_{j-1}] \right| \leq RV_+(S_j)V_-(S_j)\rho^l$$

independently of  $x_{j-1}$ , and hence that

$$\begin{aligned}
 \left| \frac{1}{m_j} \sum_{l=1}^{m_j} \int \mathbb{E}[h_x(Y_{j,l})] - \mathbb{E}[h_x(Z)] dP(x) \right| &\leq RV_+(S_j)V_-(S_j) \frac{1}{m_j} \sum_{l=1}^{m_j} \rho^l \\
 &\leq RV_+(S_j)V_-(S_j) \left( \frac{\rho}{1-\rho} \right) \frac{1}{m_j}.
 \end{aligned}$$

**Overall Bound:** Combining our bounds for the terms in (14) leads to

$$\begin{aligned}
 \mathbb{E}[\|h_j\|_{\mathcal{K}_0}^2] &\leq 2 \left( \|k_j^-\|_{\mathcal{K}_0}^2 + \mathbb{E}[\|h_j - k_j^-\|_{\mathcal{K}_0}^2] \right) \\
 &\leq \frac{4b}{\gamma} e^{-\frac{\gamma}{2} S_j^2} + 2RV_+(S_j)V_-(S_j) \left( \frac{1+\rho}{1-\rho} \right) \frac{1}{m_j} + 2RV_+(S_j)V_-(S_j) \left( \frac{\rho}{1-\rho} \right) \frac{1}{m_j} \\
 &= \frac{4b}{\gamma} e^{-\frac{\gamma}{2} S_j^2} + 2RV_+(S_j)V_-(S_j) \left( \frac{1+2\rho}{1-\rho} \right) \frac{1}{m_j}.
 \end{aligned} \tag{22}$$

In a similar manner to the proof of Theorem 6 we can square (9) (with, recall,  $\delta = 0$ ) and take expectations, which combine with (22) to produce (18) with  $C = \max \left\{ \frac{4b}{\gamma}, 2R \left( \frac{1+2\rho}{1-\rho} \right) \right\}$ .

□

Theorem 2 in the main text follows as a special case of the previous result:

*Proof of Theorem 2.* The result follows from specialising (18) to the case  $S_i^2 = \frac{2}{\gamma} \log(n \wedge m_i)$  and  $r_i = n$ . Indeed, with these settings (18) can be upper-bounded as follows (with  $C$  playing the role of a generic constant changing from line to line):

$$\begin{aligned}
 \mathbb{E} [D_{\mathcal{K}_0, P}(\{x_i\}_{i=1}^n)^2] &\leq C \exp\left(\sum_{i=1}^n \frac{1}{r_i}\right) \frac{1}{n^2} \sum_{i=1}^n \left(S_i^2 + r_i e^{-\frac{\gamma}{2} S_i^2} + V_+(S_i) V_-(S_i) \frac{r_i}{m_i}\right) \\
 &= C \frac{1}{n^2} \sum_{i=1}^n \left(\frac{2}{\gamma} \log(n \wedge m_i) + \frac{n}{n \wedge m_i} + V_+(S_i) V_-(S_i) \frac{n}{m_i}\right) \\
 &\leq C \frac{1}{n} \sum_{i=1}^n \left(\frac{\log(n \wedge m_i)}{n} + \frac{V_+(S_i) V_-(S_i)}{m_i}\right)
 \end{aligned} \tag{23}$$

as claimed.  $\square$

### A.3. Proof of Theorem 3

Our aim is to check the ergodicity preconditions of Theorem 2 when the Metropolis-adjusted Langevin algorithm (MALA) transition kernel is employed. To this end, we will establish  $V$ -uniform ergodicity of MALA for the specific choice  $V(x) = 1 + \|x\|_2$ . This will imply the convergence of SP-MCMC, as motivated by the following result:

**Theorem 8** (SP-MCMC Convergence 2). *Suppose  $k_0$  has the form (3), based on a kernel  $k \in C_b^{(1,1)}$  and a target  $P \in \mathcal{P}$  such that  $\int_{\mathcal{X}} k_0(x, \cdot) dP(x) \equiv 0$ . Let  $(m_j)_{j=1}^n \subset \mathbb{N}$  be a fixed sequence. Consider the function  $V(x) = 1 + \|x\|_2$  and consider time-homogeneous reversible Markov chains  $(Y_{j,l})_{l=1}^{m_j}$ ,  $j \in \mathbb{N}$ , generated using the same  $V$ -uniformly ergodic transition kernel. Let  $\{x_i\}_{i=1}^n$  denote the output of SP-MCMC. Then  $\exists C > 0$  such that*

$$\mathbb{E} [D_{\mathcal{K}_0, P}(\{x_i\}_{i=1}^n)^2] \leq C \frac{1}{n} \sum_{i=1}^n \frac{\log(n \wedge m_i)}{n \wedge m_i}$$

where in each case the total expectation  $\mathbb{E}$  is taken over realisations of the random sets  $\mathcal{Y}_j = \{Y_{j,l}\}_{l=1}^{m_j}$ ,  $j \in \mathbb{N}$ .

*Proof.* Firstly, consider the case where  $\exists C_0 > 0$  such that  $\frac{1}{C_0} \leq V_0(x) := \frac{V(x)}{1+k_0(x,x)^{1/2}} \leq C_0$ . In this situation we have that the functions  $V_+$  and  $V_-$  defined in Theorem 2 satisfy  $V_+(s) \leq C_0(s + s^2)$  and  $V_-(s) \leq C_0$ . It therefore follows from Theorem 2 that

$$\mathbb{E} [D_{\mathcal{K}_0, P}(\{x_i\}_{i=1}^n)^2] \leq C \frac{1}{n} \sum_{i=1}^n \left(\frac{\log(n \wedge m_i)}{n} + \frac{V_+(S_i) V_-(S_i)}{m_i}\right) \leq C \frac{1}{n} \sum_{i=1}^n \frac{\log(n \wedge m_i)}{n \wedge m_i}$$

again with  $C$  a generic constant. It is therefore sufficient to establish that  $\frac{1}{C_0} \leq V_0(x) \leq C_0$  is a consequence of the  $V$ -uniform ergodicity with  $V(x) = 1 + \|x\|_2$  that we have assumed. The lower and upper bounds on  $V_0$  are derived separately in the sequel.

**Lower Bound:** If  $\nabla \log p$  is Lipschitz and  $k(x, y) = \psi(\|x - y\|_2^2)$  with  $\psi \in C^2$  (which is the case for the pre-conditioned IMQ kernel), then it can be shown that  $k_0(x, x) \leq B\|x\|_2^2 + D$  for some  $B$  and  $D$ . Indeed, recall from (3) that

$$k_0(x, y) = \nabla_x \cdot \nabla_y k(x, y) + \langle \nabla_x k(x, y), \nabla_y \log p(y) \rangle + \langle \nabla_y k(x, y), \nabla_x \log p(x) \rangle + k(x, y) \langle \nabla_x \log p(x), \nabla_y \log p(y) \rangle$$

and note  $\nabla_x k(x, y) = 2(x - y)\psi'(\|x - y\|_2^2)$ , thus  $\nabla_x k(x, x) = 0$  and  $k_0(x, x) = \psi(0)\|\nabla_x \log p(x)\|_2^2$ . From Lipschitz continuity of  $\nabla \log p$ , say with Lipschitz constant  $C$ , we have that  $\|\nabla \log p(x)\|_2 \leq C\|x\|_2 + \|\nabla \log p(0)\|_2$ . Let  $A = \|\nabla \log p(0)\|_2$ . Thus

$$\|\nabla \log p(x)\|_2^2 \leq C^2\|x\|_2^2 + 2AC\|x\|_2 + A^2.$$

For  $\|x\|_2 \leq 1$  we have that  $C^2\|x\|_2^2 + 2AC\|x\|_2 + A^2 \leq C^2\|x\|_2^2 + 2AC + A^2$ , and for  $\|x\|_2 \geq 1$  we have that  $C^2\|x\|_2^2 + 2AC\|x\|_2 + A^2 \leq (C^2 + 2AC)\|x\|_2^2 + A^2$ . Hence for all  $x$ ,  $\exists D, B$  with

$$k_0(x, x) \leq B\|x\|_2^2 + D \tag{24}$$

as claimed. This result implies that

$$\sup_{x \in \mathcal{X}} V_0(x)^{-1} = \sup_{x \in \mathcal{X}} \frac{1 + k_0(x, x)^{\frac{1}{2}}}{V(x)} \leq \sup_{x \in \mathcal{X}} \frac{1 + \sqrt{B\|x\|_2^2 + D}}{1 + \|x\|_2} < \infty.$$

**Upper Bound:** For the converse direction we make use of the distant dissipativity assumption. Recall that this implies

$$\kappa(\|x - y\|_2)\|x - y\|_2^2 \leq -2\langle \nabla \log p(x) - \nabla \log p(y), x - y \rangle$$

and thus, setting  $y = 0$ , taking the absolute value on the right hand side and using the Cauchy-Schwarz inequality,

$$\kappa(\|x\|_2)\|x\|_2^2 \leq 2|\langle \nabla \log p(x) - \nabla \log p(0), x \rangle| \leq 2\|\nabla \log p(x) - \nabla \log p(0)\|_2\|x\|_2.$$

Rearranging, and using the triangle inequality,

$$\kappa(\|x\|_2)\|x\|_2 \leq 2\|\nabla \log p(x) - \nabla \log p(0)\|_2 \leq 2\|\nabla \log p(x)\|_2 + 2\|\nabla \log p(0)\|_2$$

and rearranging again,

$$-2\|\nabla \log p(0)\|_2 + \kappa(\|x\|_2)\|x\|_2 \leq 2\|\nabla \log p(x)\|_2.$$

Now, since  $\kappa_0 = \liminf_{r \rightarrow \infty} \kappa(r) > 0$ , there  $\exists R$  such that, for all  $\|x\|_2 > R$ ,  $\kappa(\|x\|_2) \geq \frac{\kappa_0}{2} > 0$  and hence, for  $\|x\|_2 > R$ ,

$$-2\|\nabla \log p(0)\|_2 + \frac{\kappa_0}{2}\|x\|_2 \leq 2\|\nabla \log p(x)\|_2,$$

where we are free to additionally assume that

$$R > 1 + \frac{8}{\kappa_0}\|\nabla \log p(0)\|_2. \quad (25)$$

Since  $\|x\|_2 > R$ , it follows that

$$-2\|\nabla \log p(0)\|_2 + \frac{\kappa_0}{4}R + \frac{\kappa_0}{4}\|x\|_2 \leq 2\|\nabla \log p(x)\|_2$$

and from (25) we further deduce that

$$1 + \|x\|_2 \leq \frac{8}{\kappa_0}\|\nabla \log p(x)\|_2$$

for all  $\|x\|_2 > R$ . Thus

$$\begin{aligned} \sup_{x \in \mathcal{X}} V_0(x) &= \sup_{x \in \mathcal{X}} \frac{V(x)}{1 + k_0(x, x)^{\frac{1}{2}}} \leq \sup_{\|x\|_2 \leq R} \frac{1 + \|x\|_2}{1 + k_0(x, x)^{\frac{1}{2}}} + \sup_{\|x\|_2 > R} \frac{1 + \|x\|_2}{1 + k_0(x, x)^{\frac{1}{2}}} \\ &\leq (1 + R) + \sup_{\|x\|_2 > R} \frac{\frac{8}{\kappa_0}\|\nabla \log p(x)\|_2}{1 + \psi(0)^{1/2}\|\nabla \log p(x)\|_2} < \infty \end{aligned}$$

as required.  $\square$

The implication of Theorem 8 is that we can seek to establish  $V$ -uniform ergodicity of MALA in the case  $V(x) = 1 + \|x\|_2$ . To this end, we present Lemmas 1, 2, Proposition 1 and Theorem 9 next:

**Lemma 1.** *Let  $U, V : \mathcal{X} \rightarrow [1, \infty)$  be functions such that  $V < cU$  and  $U < aV$  for  $c, a > 0$ . Then a Markov chain is  $U$ -uniformly ergodic if and only if it is  $V$ -uniformly ergodic.*



*Proof.* Suppose  $\exists R_U \in [0, \infty)$ ,  $\rho_U \in (0, 1)$  such that

$$\|P^n(y, \cdot) - P\|_U \leq R_U U(y) \rho_U^n$$

for all initial states  $y \in \mathcal{X}$ . From the definition of the  $V$ -norm, we have that  $\frac{1}{c} \|f\|_U \leq \|f\|_V \leq a \|f\|_U$ , and moreover

$$\|\mu\|_V = \sup_{\|f\|_V \neq 0} \frac{|\mu f|}{\|f\|_V} \leq c \|\mu\|_U.$$

Together, these imply that

$$\|P^n(y, \cdot) - P\|_V \leq c \|P^n(y, \cdot) - P\|_U \leq c R_U U(y) \rho_U^n \leq ac R_U V(y) \rho_U^n = R_V V(y) \rho_V^n$$

where  $R_V := ac R_U \in [0, \infty)$  and  $\rho_V = \rho_U \in (0, 1)$ . Thus  $U$ -uniform ergodicity implies  $V$ -uniform ergodicity. The converse result follows by symmetry.  $\square$

The next Lemma concerns the unadjusted Langevin algorithm (ULA), whose proposal distribution is identical to MALA, but the acceptance/rejection step is not performed (Roberts & Tweedie, 1996). As such, ULA does not leave  $P$  invariant but leaves a different distribution, which we denote  $\tilde{P}$ , invariant.

**Lemma 2** (Properties of ULA Proposal Distribution). *Suppose  $P \in \mathcal{P}$  and  $\mathcal{X} = \mathbb{R}^d$ . Let  $c(x) := x + \frac{h}{2} \nabla \log p(x)$ . Then  $\exists R, h_0, \kappa > 0$  such that, for  $\|x\|_2 > R$ , it holds that*

$$\|c(x)\|_2^2 < \left(1 - \frac{\kappa h}{2}\right) \|x\|_2^2 \quad (26)$$

whenever the step size  $h$  satisfies  $h < h_0$ . Moreover let  $Y$  be distributed as the MALA proposal distribution starting from  $x \in \mathcal{X}$ , namely  $Y \stackrel{d}{=} c(x) + \sqrt{h}Z$ , where  $h > 0$  and  $Z \sim \mathcal{N}(0, I)$  where  $I$  is a  $d \times d$  identity matrix. Then  $\exists R_2, h_0, \kappa_2 > 0$  such that for  $\|x\|_2 > R_2$ ,  $s < 1/2h$ , it holds that

$$\mathbb{E} [\exp(s\|Y\|_2^2)] < \frac{1}{(1 - 2sh)^{d/2}} \exp\left(\left[\frac{1 - \frac{\kappa_2}{2}}{1 - 2sh}\right] s \|x\|_2^2\right)$$

whenever the step size  $h$  satisfies  $h < h_0$ . Let  $A(h) := \kappa_2 h / (4 - \kappa_2 h)$ . Then, furthermore, if  $s < \min\{1/2h, \kappa_2/8\}$ , then

$$\mathbb{E} [\exp(s\|Y\|_2^2)] < \frac{4^{d/2}}{(4 - \kappa_2 h)^{d/2}} \exp([1 - A(h)]s\|x\|_2^2)$$

and  $A(h) \in (0, 1)$  whenever the step size  $h$  satisfies  $h < \min\{h_0, 2/\kappa_2\}$ .

*Proof.* We expand

$$\|c(x)\|_2^2 = \left\langle x + \frac{h}{2} \nabla \log p(x), x + \frac{h}{2} \nabla \log p(x) \right\rangle = \|x\|_2^2 + h \langle x, \nabla \log p(x) \rangle + \frac{h^2}{4} \|\nabla \log p(x)\|_2^2. \quad (27)$$

Since  $P$  is distantly dissipative, we know for any  $r > 0$  and any  $x$  with  $\|x\|_2 = r$ ,

$$\kappa(r) \leq -2 \frac{\langle \nabla \log p(x) - \nabla \log p(0), x \rangle}{\|x\|_2^2}.$$

Moreover, since  $\kappa_0 := \liminf_{r \rightarrow \infty} \kappa(r) > 0$ ,  $\exists R_1 > 0$  and  $\kappa_1 \in (0, \kappa_0)$  such that for all  $\|x\|_2 > R_1$ , we have  $\kappa(\|x\|_2) \geq \kappa_1$ . Thus for any  $\|x\|_2 > R_1$  we have that

$$\begin{aligned} \kappa_1 \|x\|_2^2 &\leq -2 \langle \nabla \log p(x) - \nabla \log p(0), x \rangle \\ &= -\langle \nabla \log p(x), x \rangle + \langle \nabla \log p(0), x \rangle \leq -\langle \nabla \log p(x), x \rangle + \|\nabla \log p(0)\|_2 \|x\|_2 \end{aligned}$$

Let  $\kappa_2 \in (0, \kappa_1)$ , so that for  $\|x\|_2 > \|\nabla \log p(0)\|_2 / \kappa_1 - \kappa_2$ , we have  $\kappa_2 \|x\|_2^2 \leq \kappa_1 \|x\|_2^2 - \|\nabla \log p(0)\|_2 \|x\|_2$ . Hence, for  $\|x\|_2 > R_2 := \max\{R_1, \|\nabla \log p(0)\|_2 / \kappa_1 - \kappa_2\}$ , we have that

$$\kappa_2 \|x\|_2^2 \leq -\langle \nabla \log p(x), x \rangle.$$

Since  $\nabla \log p$  is Lipschitz, there exists a constant  $L$  such that for all  $x$  we have  $\|\nabla \log p(x) - \nabla \log p(0)\|_2 \leq L\|x\|_2$ . It follows that for all  $\|x\|_2 > R_2$ ,

$$\|\nabla \log p(x)\|_2 \leq \underbrace{\left( L + \frac{\|\nabla \log p(0)\|_2}{R_2} \right)}_{=: \tilde{L}} \|x\|_2.$$

Hence for  $\|x\|_2 > R_2$  we have, from (27) and the bounds just obtained, that  $\|c(x)\|_2^2 \leq \|x\|_2^2 - h\kappa_2\|x\|_2^2 + (h^2/4)\tilde{L}^2\|x\|_2^2$ . For  $h < h_0 := 2\kappa_2/\tilde{L}^2$  we have that  $h\kappa_2/2 > (h^2/4)\tilde{L}^2$ , so that  $1 - h\kappa_2 + \frac{h^2}{4}\tilde{L}^2 < 1 - (\kappa_2 h)/2$  and therefore have that  $\|c(x)\|_2^2 < (1 - \kappa_2 h/2)\|x\|_2^2$ . The first part of the Lemma is now established.

For the second part, In this theorem, we consider the proposal distribution of MALA which is an unadjusted Langevin algorithm (ULA). First note that

$$\mathbb{E} \left[ \exp(s\|Y\|_2^2) \right] = \mathbb{E} \left[ \exp \left( s \left\| \sqrt{h}Z + c(x) \right\|_2^2 \right) \right] = \mathbb{E} \left[ \exp \left( sh \left\| Z + \frac{c(x)}{\sqrt{h}} \right\|_2^2 \right) \right] = \mathbb{E} \left[ \exp(shW^2) \right], \quad (28)$$

where  $W := \|Z + c(x)/\sqrt{h}\|_2^2$  is a non-central chi-squared random variable with non-centrality parameter  $\lambda = \|c(x)\|_2^2/h$  and degrees of freedom  $d$ . The last expression is recognised as the moment generating function  $M_W(t) = \mathbb{E}[e^{tW}]$  of  $W$ , evaluated at  $t = sh$ . Recall that  $M_W(t) = (1/(1-2t)^{d/2}) \exp(\lambda t/(1-2t))$ , valid for  $2t < 1$  (Sec. 26.4.25 of Abramowitz & Stegun, 1972). Hence, for  $2sh < 1$  we have that

$$\mathbb{E} \left[ \exp(s\|Y\|_2^2) \right] = \frac{1}{(1-2sh)^{d/2}} \exp \left( \frac{s\|c(x)\|_2^2}{1-2sh} \right).$$

We then observe that if additionally  $s < \kappa_2/8$  and  $h < 2/\kappa_2$  then

$$\frac{1 - \frac{\kappa_2}{2}h}{1 - 2sh} < \frac{1 - \frac{\kappa_2}{2}h}{1 - \frac{\kappa_2}{4}h} = 1 - A(h), \quad \frac{1}{(1-2sh)^{d/2}} < \frac{4^{d/2}}{(4 - \kappa_2 h)^{d/2}}, \quad \text{and} \quad A(h) = \frac{\kappa_2 h}{4 - \kappa_2 h} < 1$$

as required.  $\square$

**Proposition 1** ( $U_s$ -Uniform Ergodicity of ULA). *Suppose  $P \in \mathcal{P}$  and  $\mathcal{X} = \mathbb{R}^d$ . The one-step transition kernel  $P = P^1$  of ULA satisfies*

$$PU_s(x) \leq \tau_1 U_s(x) + \tau_0 \quad (29)$$

for some  $\tau_1 < 1$  and  $\tau_0 \in \mathbb{R}$ , for each of  $U_s(x) = \exp(s\|x\|_2^2)$  (any  $s > 0$ ),  $\exp(s\|x\|_2^2)$  (some  $s > 0$ ), and  $U_s(x) = 1 + \|x\|_2^s$  ( $s \in \{1, 2\}$ ). Thus ULA is  $U_s$ -uniformly ergodic for its invariant distribution  $\tilde{P}$  for each of these  $U_s(x)$ .

*Proof.* The strategy of the proof is to establish the geometric drift condition

$$\limsup_{\|x\|_2 \rightarrow \infty} \frac{PU_s(x)}{U_s(x)} < 1 \quad (30)$$

for each of the functions  $U_s$  given in the statement. Let  $c(x) := x + \frac{h}{2}\nabla \log p(x)$  and consider the ULA density at a given point  $x$ , defined as

$$q(x, y) := \frac{1}{(2\pi h)^{k/2}} \exp \left( -\frac{1}{2h} \|y - c(x)\|_2^2 \right).$$

Then we have that

$$\begin{aligned} \gamma(x) &:= U_s(x)^{-1} \int_{\mathcal{X}} q(x, y) U_s(y) dy \\ &= \frac{U_s(x)^{-1}}{(2\pi h)^{k/2}} \int \exp \left( -\frac{1}{2h} \|y - c(x)\|_2^2 \right) U_s(y) dy \\ &= \frac{1}{(2\pi h)^{k/2}} U_s(x)^{-1} \int \exp \left( -\frac{1}{2h} \|y\|_2^2 \right) U_s(y + c(x)) dy \\ &= \frac{1}{(2\pi)^{k/2}} U_s(x)^{-1} \int \exp \left( -\frac{1}{2} \|y\|_2^2 \right) U_s(\sqrt{h}y + c(x)) dy = U_s(x)^{-1} \mathbb{E} [U_s(Y)] \end{aligned}$$

where  $Y$  is the random variable defined in the statement of Lemma 2; c.f. (28). Now we consider each of the functions  $U_s(x) = \exp(s\|x\|_2)$ ,  $\exp(s\|x\|_2^2)$  and  $1 + \|x\|_2^2$  in turn (the case  $1 + \|x\|_2$  will be treated separately at the end):

- For  $U_s(x) = \exp(s\|x\|_2)$ , let  $\tilde{Z} = h^{\frac{1}{2}}Z$  where  $Z \sim \mathcal{N}(0, I)$ , so that

$$\gamma(x) = \frac{\mathbb{E}[\exp(s\|Y\|_2)]}{\exp(s\|x\|_2)} = \frac{\mathbb{E}[\exp(s\|\tilde{Z} + c(x)\|_2)]}{\exp(s\|x\|_2)} \leq \frac{\mathbb{E}[\exp(s\|\tilde{Z}\|_2)] \exp(s\|c(x)\|_2)}{\exp(s\|x\|_2)} \quad (31)$$

$$\leq \mathbb{E}[\exp(s\|\tilde{Z}\|_2)] \exp\left(\left(\sqrt{1 - \frac{\kappa h}{2}} - 1\right)s\|x\|_2\right) \quad (32)$$

where we have used the triangle inequality in (31) and we have used (26) from Lemma 2 to obtain (32). The final bound goes to zero as  $\|x\|_2 \rightarrow \infty$ , since a Gaussian has finite exponential moments, and thus the geometric drift condition is satisfied.

- For  $U_s(x) = \exp(s\|x\|_2^2)$ , from the conclusion of Lemma 2 we have that, with  $A(h) := \kappa_2 h / (4 - \kappa_2 h)$ ,

$$\gamma(x) < \frac{4^{d/2}}{(4 - \kappa_2 h)^{d/2}} \exp(-s\|x\|_2^2) \exp([1 - A(h)]s\|x\|_2^2) = \frac{4^{d/2}}{(4 - \kappa_2 h)^{d/2}} \exp(-A(h)s\|x\|_2^2)$$

where  $A(h) \in (0, 1)$ . It is therefore clear that for  $\|x\|_2$  sufficiently large we have  $\gamma(x) < 1$ , so that the geometric drift condition is satisfied.

- For  $U_s = 1 + \|x\|_2^2$ , we have

$$\gamma(x) = \frac{1 + \mathbb{E}[\|Z\sqrt{h} + c(x)\|_2^2]}{(1 + \|x\|_2^2)} = \frac{1 + h\mathbb{E}[\|Z\|_2^2] + \|c(x)\|_2^2 + 2\sqrt{h}\mathbb{E}[\langle Z, c(x) \rangle]}{(1 + \|x\|_2^2)}$$

where  $Z \sim \mathcal{N}(0, I)$ . Moreover  $\mathbb{E}[\langle Z, c(x) \rangle] = \langle \mathbb{E}[Z], c(x) \rangle = 0$ , and from Lemma 2,  $\exists R, h_0, \kappa > 0$  such that for  $\|x\|_2 > R$ , it holds that  $\|c(x)\|_2^2 < (1 - \frac{\kappa h}{2})\|x\|_2^2$  for  $h < h_0$ . Hence

$$\gamma(x) < \frac{1 + h\mathbb{E}[\|Z\|_2^2] + (1 - \frac{\kappa h}{2})\|x\|_2^2}{1 + \|x\|_2^2}$$

and for  $\|x\|_2$  sufficiently large we have  $\gamma(x) < 1$ , and the geometric drift condition is satisfied.

Thus for  $\|x\| > R$  and appropriate  $h, s$ , there exists  $\tau_1 \in (0, 1)$  s.t.,  $PU_s(x) \leq \tau_1 U_s(x)$ , and since  $PU_s$  bounded on the compact set  $C = \{x \in \mathbb{R}^d : \|x\|_2 \leq R\}$ , there exists  $\tau_0 \in \mathbb{R}$  s.t.,  $PU_s(x) \leq \tau_1 U_s(x) + \tau_0 \mathbb{I}_C(x)$  for all  $x$ , where  $\mathbb{I}$  is the indicator function. Thus by section 3.1 of (Roberts & Tweedie, 1996), the chain is  $U_s$ -uniformly ergodic for each of  $U_s(x) = \exp(s\|x\|_2^2)$ ,  $\exp(s\|x\|_2)$  and  $1 + \|x\|_2^2$ .

The remaining case to establish is  $U_s$ -uniform ergodicity for  $U_s(x) = 1 + \|x\|_2^s$  and  $s = 1$ . For this, we leverage the fact that  $U$ -uniform ergodicity implies  $\sqrt{U}$ -uniform ergodicity by Lemma 15.2.9 (Meyn & Tweedie, 2012). The stated result will then follow from Lemma 1, since for some  $c > 0$ ,  $\frac{1}{c}U_1(x) \leq \sqrt{U_2(x)} \leq cU_1(x)$ .  $\square$

Our theoretical analysis now focuses on the MALA transition kernel, which is precisely defined in Appendix A.5. In what follows, as in the main text, let  $q(x, \cdot)$  be a density for the proposal distribution of MALA, starting from the state  $x$ , and let

$$\alpha(x, y) := \min \left\{ 1, \frac{p(y)q(y, x)}{p(x)q(x, y)} \right\}$$

denote the MALA acceptance probability for moving from  $x$  to  $y$ , given that  $y$  has been proposed. As in the main text, we let  $A(x) = \{y \in \mathcal{X} : \alpha(x, y) = 1\}$  denote the region where proposals are always accepted and let  $R(x) = \mathcal{X} \setminus A(x)$ . Let  $I(x) := \{y : \|y\|_2 \leq \|x\|_2\}$  represent the set of points interior to  $x$ .

**Theorem 9 (V-Uniform Ergodicity of MALA).** *Suppose  $P \in \mathcal{P}$  and  $\mathcal{X} = \mathbb{R}^d$ . Consider MALA with step size  $h$  and one-step transition kernel  $P = P^1$ . Further assume  $P$  is such that MALA is inwardly convergent. Then, for  $V = U_s$ , where  $U_s$  is any of the functions defined in Proposition 1 for which ULA is  $U_s$ -uniformly ergodic,*

$$PV(x) \leq \tau_1 V(x) + \tau_0. \quad (33)$$

Hence, in particular, MALA is  $V$ -uniformly ergodic.

*Proof.* The proof strategy follows Theorem 4.1 of (Roberts & Tweedie, 1996), which is based on establishing the geometric drift condition (33) in the form (30). Let  $c(x) := x + \frac{h}{2} \nabla \log p(x)$  denote the MALA drift and let

$$q(x, y) := \frac{1}{(2\pi h)^{k/2}} \exp\left(-\frac{1}{2h} \|y - c(x)\|_2^2\right).$$

Then, using  $\mathbb{I}[\cdot]$  to denote the indicator function, the ratio in the geometric drift condition for  $V$  can be decomposed and bounded as follows:

$$\begin{aligned} \frac{\int V(y)P(x, y)dy}{V(x)} &= \int_{A(x)} q(x, y) \frac{V(y)}{V(x)} dy + \int_{R(x)} q(x, y) \frac{V(y)}{V(x)} \alpha(x, y) dy + \int_{R(x)} q(x, y) [1 - \alpha(x, y)] dy \\ &= \int_{\mathcal{X}} q(x, y) \frac{V(y)}{V(x)} dy - \int_{R(x)} q(x, y) \frac{V(y)}{V(x)} (\alpha(x, y) - 1) dy + \int_{R(x)} q(x, y) [1 - \alpha(x, y)] dy \\ &= \int_{\mathcal{X}} q(x, y) \frac{V(y)}{V(x)} dy + \int_{R(x)} q(x, y) \left[1 - \frac{V(y)}{V(x)}\right] [1 - \alpha(x, y)] dy \\ &\leq \int_{\mathcal{X}} q(x, y) \frac{V(y)}{V(x)} dy + \int_{R(x)} q(x, y) \mathbb{I}\left[1 - \frac{V(y)}{V(x)} \geq 0\right] [1 - \alpha(x, y)] dy \\ &\leq \int_{\mathcal{X}} q(x, y) \frac{V(y)}{V(x)} dy + \int_{R(x) \cap I(x)} q(x, y) dy \end{aligned}$$

where we have used  $V(y) \leq V(x)$  for  $x \in I(x)$ . The final term vanishes as  $\|x\|_2 \rightarrow \infty$  from the assumption that MALA is inwardly convergent; c.f. (7). So to establish the geometric drift condition for  $V$  it remains to show that the first term is asymptotically  $< 1$ , that is ULA is  $V$ -uniformly ergodic. This was proved in Proposition 1.  $\square$

Our main result, Theorem 3, follows immediately as a consequence of the results just established and the auxiliary Lemma 3:

*Proof of Theorem 3.* It will be demonstrated that the preconditions of Theorem 8 are satisfied. Indeed, from Theorem 9 we have that (under our assumptions) MALA is  $V$ -uniformly ergodic for  $V(x) = 1 + \|x\|_2$ . In addition, since  $k_0$  has the form (3), based on a kernel  $k \in C_b^{(1,1)}$ , from (24) we have that  $k_0(x, x) \leq B\|x\|_2^2 + D$  and thus, for  $\gamma > 0$  sufficiently small,

$$\mathbb{E}_{Z \sim P}[e^{\gamma k_0(Z, Z)}] \leq e^D \mathbb{E}_{Z \sim P}[e^{\gamma B \|Z\|_2^2}] < \infty$$

since distant dissipativity of  $P$  implies that  $P$  is sub-Gaussian (c.f. Lemma 3). It follows that the preconditions of Theorem 8 hold and thus the result is established.  $\square$

**Lemma 3.** *If  $P$  is a distantly dissipative distribution on  $\mathcal{X} = \mathbb{R}^d$  with  $b(x) := \nabla \log p(x)$  continuous, then  $P$  is sub-Gaussian; i.e.  $\mathbb{E}_{X \sim P}[e^{a\|X\|_2^2}] < \infty$  for some  $a > 0$ .*

*Proof.* Since  $P$  is distantly dissipative,  $\exists R, \kappa$  such that  $\langle b(x) - b(y), x - y \rangle \leq -\frac{\kappa}{2} \|x - y\|_2^2$  holds for all  $\|x - y\|_2 \geq R$ . Fix  $x \in \mathcal{X}$  with  $\|x\|_2 \geq R$  and define  $\tau := R/\|x\|_2$ . By the gradient theorem (i.e. the fundamental theorem of calculus for line integrals) applied to the curve  $r : [0, 1] \rightarrow \mathcal{X}$ ,  $r(t) := tx$ , we have that

$$\begin{aligned} \log p(x) - \log p(0) &= \int_0^1 \langle b(r(t)), r'(t) \rangle dt \\ &= \int_0^1 \langle b(tx), x \rangle dt \\ &= \langle b(0), x \rangle + \int_0^1 \frac{1}{t} \langle b(tx) - b(0), tx \rangle dt \\ &\leq \|b(0)\|_2 \|x\|_2 + \underbrace{\int_0^\tau \langle b(tx) - b(0), x \rangle dt}_{(*)} + \underbrace{\int_\tau^1 \frac{1}{t} \times -\frac{\kappa}{2} \|tx\|_2^2 dt}_{(**)} \end{aligned}$$

where in the final inequality we have used Cauchy-Schwartz followed by the distant dissipativity property of  $P$ .

The term  $(*)$  is an integral of the continuous function  $b$  inside the ball  $B(0, R)$  and thus, using Cauchy-Schwartz,  $(*)$  can be upper bounded by  $c_0\|x\|_2$  for some constant  $c_0$  independent of  $x$ . The term  $(**)$  can be directly evaluated to see that

$$(**) = -\frac{\kappa}{4} \left( 1 - \frac{R^2}{\|x\|_2^2} \right) \|x\|_2^2.$$

Thus, for  $\|x\|_2 \geq R$ , we have the overall bound

$$\log p(x) - \log p(0) \leq (\|b(0)\|_2 + c_0)\|x\|_2 - \frac{\kappa}{4} \left( 1 - \frac{R^2}{\|x\|_2^2} \right) \|x\|_2^2. \quad (34)$$

A straightforward argument based on (34) establishes that  $\mathbb{E}_{X \sim P}[e^{a\|X\|_2^2}] < \infty$  for some  $a > 0$ , as required.  $\square$

#### A.4. Proof of Theorem 4

Our final theoretical contribution is to demonstrate that a preconditioned kernel still ensures that KSD provides control over weak convergence of measure:

*Proof of Theorem 4.* In what follows,  $(\cdot)_\#$  is used to denote the push-forward, so that for a random variable  $Z : \Omega \rightarrow \mathcal{Z}$ , the pushforward  $Z_\#\mathbb{P}$  is the measure on  $\mathcal{Z}$  with  $(Z_\#\mathbb{P})(S) = \mathbb{P}(Z^{-1}(S))$  for all measurable  $S$ , where  $Z^{-1}(S)$  is the pre-image of  $S$ .

Recall that in Theorem 8 of (Gorham & Mackey, 2017) the result was established in the specific case of  $\Lambda = I$ . Our strategy in what follows is to prove that if  $P$  is distantly dissipative, then so is the pushforward  $\Lambda_\#^{-1/2}P$ . The required result will then follow from a global change of coordinates  $x \mapsto \Lambda^{-1/2}x$ .

To this end, let  $P$  be a distantly dissipative distribution with  $P = p\bar{d}\lambda$ , with  $\lambda$  the Lebesgue measure on  $\mathcal{X} = \mathbb{R}^d$ . Since  $\Lambda^{-1}$  is symmetric positive definite (SPD), we may denote its unique SPD square root  $\Gamma := \Lambda^{-1/2}$ . Note that  $\Gamma_\#P = p \circ \Gamma^{-1}(\det\Gamma)^{-1}\bar{d}\lambda$ , and in particular its score function is  $b_\Gamma := \nabla \log(p \circ \Gamma^{-1}(\det\Gamma)^{-1}) = \nabla \log(p \circ \Gamma^{-1})$ . Our goal is to show that  $\Gamma_\#P$  is distantly dissipative, meaning that  $\liminf_{r \rightarrow \infty} \kappa_\Gamma(r) > 0$  for

$$\kappa_\Gamma(r) := \inf \left\{ -2 \frac{\langle b_\Gamma(x) - b_\Gamma(y), x - y \rangle}{\|x - y\|_2^2} : \|x - y\|_2 = r \right\}.$$

First, notice that:

$$\begin{aligned} \frac{\langle b_\Gamma(x) - b_\Gamma(y), x - y \rangle}{\|x - y\|_2^2} &= \frac{\langle \nabla \log p(\Gamma^{-1}(x)) - \nabla \log p(\Gamma^{-1}(y)), x - y \rangle}{\|x - y\|_2^2} \\ &= \frac{\langle \nabla \log p(\Gamma^{-1}(x)) - \nabla \log p(\Gamma^{-1}(y)), \Gamma(\Gamma^{-1}x - \Gamma^{-1}y) \rangle}{\|x - y\|_2^2} \\ &= \frac{\langle \nabla \log p(z_x) - \nabla \log p(z_y), \Gamma(z_x - z_y) \rangle}{\|\Gamma z_x - \Gamma z_y\|_2^2} = \frac{\langle \nabla \log p(z_x) - \nabla \log p(z_y), z_x - z_y \rangle_\Gamma}{\|z_x - z_y\|_{\Lambda^{-1}}^2}, \end{aligned}$$

where  $z_x := \Gamma^{-1}x$ ,  $\langle v, u \rangle_B := \langle v, Bu \rangle = v^\top Bu$ , and  $\|\cdot\|_B$  is the norm induced by  $\langle \cdot, \cdot \rangle_B$ . Note that  $\|\Gamma v\| = \langle \Gamma v, \Gamma v \rangle = \langle v, \Gamma^\top \Gamma v \rangle = \langle v, v \rangle_{\Lambda^{-1}}$ . Now since  $\Gamma$  is an SPD matrix, we can consider its eigendecomposition  $\Gamma = P^{-1}DP$  where  $D$  is diagonal with entries the eigenvalues of  $\Gamma$  and  $P$  is a matrix whose rows contain the corresponding eigenvectors of  $\Gamma$ . Denote by  $\gamma > 0$  the largest eigenvalue of  $\Gamma$ . Then, we have that

$$\langle v, u \rangle_\Gamma = v^\top \Gamma u = v^\top P^{-1}DPu \leq \gamma v^\top P^{-1}IPu = \gamma v^\top u = \gamma \langle v, u \rangle.$$

where  $I$  is a  $d \times d$  identity matrix. Applying this result to the quantity of interest, we get:

$$\left\langle \nabla \log p(z_x) - \nabla \log p(z_y), z_x - z_y \right\rangle_\Gamma \leq \gamma \left\langle \nabla \log p(z_x) - \nabla \log p(z_y), z_x - z_y \right\rangle,$$

Moreover since all norms on  $\mathbb{R}^d$  are equivalent  $\|z_x - z_y\|_{\Lambda^{-1}}^2 \geq C^{-1}\|z_x - z_y\|_2^2$  for some  $C > 0$ . Hence

$$\frac{\langle \nabla \log p(z_x) - \nabla \log p(z_y), z_x - z_y \rangle_{\Gamma}}{\|z_x - z_y\|_{\Lambda^{-1}}^2} \leq C\gamma \frac{\langle \nabla \log p(z_x) - \nabla \log p(z_y), z_x - z_y \rangle}{\|z_x - z_y\|_2^2},$$

and thus, combining all of the results above:

$$\kappa_{\Gamma}(r) \geq \inf \left\{ -2C\gamma \frac{\langle \nabla \log p(z_x) - \nabla \log p(z_y), z_x - z_y \rangle}{\|z_x - z_y\|_2^2} : \|\Gamma(z_x - z_y)\|_2 = r \right\}.$$

Note that the set  $\{v : \|\Gamma v\| = r\}$  is no longer a sphere (in which case we would be done), it is an ellipsoid. However there exists  $r_1, r_2 > 0$  s.t.  $r_1 \leq \|v\| \leq r_2$  if  $\|\Gamma v\| = r$ . Then

$$\kappa_{\Gamma}(r) \geq \inf \left\{ -2C\gamma \frac{\langle \nabla \log p(z_x) - \nabla \log p(z_y), z_x - z_y \rangle}{\|z_x - z_y\|_2^2} : r_1 \leq \|z_x - z_y\|_2 \leq r_2 \right\} = C\gamma\kappa(r_3),$$

where  $\kappa$  was defined in Section 5 of the main text and  $r_3 \in [r_1, r_2]$ . By hypothesis  $\liminf_{r \rightarrow \infty} \kappa(r) > 0$ , from which  $\liminf_{r \rightarrow \infty} \kappa_{\Gamma}(r) > 0$  follows and the result is established.  $\square$

## A.5. Details of Markov Kernels Used

All experiments in this paper based on MCMC were conducted using either the random walk Metropolis (RWM) algorithm or the Metropolis-adjusted Langevin algorithm (MALA) of (Roberts & Tweedie, 1996). Note that the  $P$ -invariance of the Markov kernel is not fundamental in SP-MCMC and one could, for example, consider also using an *unadjusted* version in which a Metropolis-Hastings correction is not applied. However, in order to control for the performance of different MCMC kernels, all experiments in this paper used either the RWM or the MALA kernel, which are both  $P$ -invariant.

The RWM algorithm is a Metropolis-Hastings method (Metropolis et al., 1953) based on the proposal

$$x \mapsto x + h^{1/2}\xi$$

where  $\xi \sim \mathcal{N}(0, \Sigma)$ . The MALA algorithm is a Metropolis-Hastings method (Metropolis et al., 1953) based on the proposal

$$x \mapsto x + \frac{h}{2}\Sigma^{-1}\nabla \log p(x) + h^{1/2}\xi$$

where  $\xi \sim \mathcal{N}(0, \Sigma)$ . In both cases the *step size* parameter  $h$  was calibrated according to the recommendations in (Roberts & Rosenthal, 2001). The positive definite matrix  $\Sigma$  was taken to be a sample-based approximation to the covariance matrix of  $P$ , generated by running a long MCMC.<sup>6</sup>

## A.6. Additional Empirical Results

### A.6.1. BENCHMARK METHODS

In this section we recall the MCMC, MED and SVGD methods used as an empirical benchmark. A relatively default version of each method was used. However, we note that both MED and SVGD are being actively developed and we provide references to more sophisticated formulations of those methods where appropriate in the sequel.

**Markov Chain Monte Carlo** The standard MCMC benchmark in this work was based on a single sample path of MALA, described in Appendix A.5, which is subsequently thinned by discarding all but every  $m_j$ th point. Thus the length of the sample path is  $m_j n$ , where  $n$  is the number of points that constitute the final point set. The choice to keep every  $m_j$ th state serves to ensure that the MCMC benchmark and SP-MCMC are based on the same Markov kernel, so that empirical results are not confounded.

<sup>6</sup>Our interest in this work was not on the construction of efficient Markov transition kernels, and we defer a more detailed empirical investigation of the impact of poor choice of transition kernel to further work.

**Minimum Energy Designs** The MED method that we consider in this work was proposed as an algorithm for Bayesian computation in (Joseph et al., 2015). That work restricted attention to  $\mathcal{X} = [0, 1]^d$  and constructed an energy functional

$$\mathcal{E}_{\delta, P}(\{x_i\}_{i=1}^n) := \sum_{i \neq j} \left[ \frac{\tilde{p}(x_i)^{-\frac{1}{2\delta}} \tilde{p}(x_j)^{-\frac{1}{2\delta}}}{\|x_i - x_j\|_2} \right]^\delta$$

for some tuning parameter  $\delta \in [1, \infty)$  to be specified. In (Joseph et al., 2018) the default choice of  $\delta \rightarrow \infty$  was proposed, so that the energy functional can be interpreted as (up to an appropriate re-normalisation)

$$\mathcal{E}_{\infty, P}(\{x_i\}_{i=1}^n) = \min_{i \neq j} \left[ \frac{\tilde{p}(x_i)^{-\frac{1}{2\delta}} \tilde{p}(x_j)^{-\frac{1}{2\delta}}}{\|x_i - x_j\|_2} \right].$$

This default form has the advantage of removing dependence on the hyper-parameter  $\delta$  and simultaneously enabling more stable computation, being based on  $\log \tilde{p}$  rather than  $\tilde{p}$ :

$$\log \mathcal{E}_{\infty, P}(\{x_i\}_{i=1}^n) = - \min_{i \neq j} \left[ \frac{1}{2d} \log \tilde{p}(x_i) + \frac{1}{2d} \log \tilde{p}(x_j) + \log \|x_i - x_j\|_2 \right].$$

A preliminary theoretical analysis of the MED method was also provided in (Joseph et al., 2018). This focussed on the properties of a point set that globally minimised the energy functional, but did not account for the practical aspect of approximating such a point set. In fact, minimisation of  $\mathcal{E}_{\infty, P}$  can be practically rather difficult. For an explicit algorithm, (Joseph et al., 2015) proposed a greedy method, which (for the case  $\delta \rightarrow \infty$ ) is defined as

$$x_1 \in \arg \max_{x \in \mathcal{X}} \tilde{p}(x), \quad x_n \in \arg \max_{x \in \mathcal{X}} \min_{i=1, \dots, n-1} \left[ \frac{1}{2d} \log \tilde{p}(x_i) + \frac{1}{2d} \log \tilde{p}(x) + \log \|x_i - x\|_2 \right] \quad n \geq 2. \quad (35)$$

The method was recently implemented in the R package `mined`, available at <https://cran.r-project.org/web/packages/mined/>. Although the results presented in this work are based on our own implementation of (35) in MATLAB, it would be interesting in further work to explore the extent to which the performance of MED is improved in `mined`.

For the results reported in this paper, the global optimisation in (35) was replaced by an adaptive Monte Carlo optimisation method. Indeed, in Fig. 2(c) of (Chen et al., 2018b) it was established that MED performed best for SP when an adaptive Monte Carlo optimisation was used, compared to both a basic grid search and the Nelder–Mead method (Nelder & Mead, 1965). Specifically, the adaptive Monte Carlo method is described in Alg. 1. Here  $\mu_0$  and  $\Sigma_0$  are the mean and covariance of a Gaussian and are selected to approximately match the first two moments of  $P$ . The notation  $\Pi(\{z_i\}_{i=1}^n, \lambda)$  denotes a uniform-weighted Gaussian mixture distribution with each component having identical variance  $\lambda$ , to be specified. Thus the algorithm described in Alg. 1 picks randomly between drawing a set  $\{x_i^{\text{test}}\}_{i=1}^{n_{\text{test}}}$  from  $\mathcal{N}(\mu_0, \Sigma_0)$  (with probability  $\alpha_n$  to be specified) and drawing such a set instead from  $\Pi(\{x_i\}_{i=1}^{n-1}, \lambda)$ , a Gaussian mixture based on the current point set  $\{x_i\}_{i=1}^{n-1}$ .

For our experiments, the parameters  $\alpha_n, \mu, \Sigma_0, n_{\text{test}}$  of Alg. 1 were approximately optimised in favour of MED. However, it is likely that the numerical optimisation routine used in `mined` will lead to different results to those reported in this work, and it may be possible to obtain better performance when more sophisticated numerical optimisation routines are used.

**Stein Variational Gradient Descent** The SVGD method was first proposed in (Liu & Wang, 2016) and subsequently studied in (e.g.) (Liu, 2017; Liu & Wang, 2018). The approach is rooted in a continuous version of gradient descent on  $\mathcal{P}(\mathcal{X})$ , the set of probability distributions on  $\mathcal{X}$ , with the Kullback-Leibler divergence  $\text{KL}(\cdot \| P)$  providing the gradient. To this end, restrict attention to  $\mathcal{X} = \mathbb{R}^d$ , let  $\mathcal{K}$  be a RKHS as in the main text and consider the discrete time process

$$S_f(x) = x + \epsilon g(x)$$

parametrised by a function  $g \in \mathcal{K}^d$ . For an infinitesimal time step  $\epsilon$  we can lift  $S_g$  to a pushforward map on  $\mathcal{P}(\mathcal{X})$ ; i.e.  $Q \mapsto (S_g)_\# Q$ . Then (Liu & Wang, 2016) established that

$$- \frac{d}{d\epsilon} \text{KL}((S_g)_\# Q \| P) \Big|_{\epsilon=0} = \int_{\mathcal{X}} \mathcal{A}g \, dQ \quad (36)$$

---

**Algorithm 1** Adaptive Monte Carlo search method to select  $x_n$ 


---

```

1: Draw  $u \sim \text{Unif}(0, 1)$ 
2: if  $u \leq \alpha_n$  then
3:   Draw  $\{x_i^{\text{test}}\}_{i=1}^{n_{\text{test}}} \sim \mathcal{N}(\mu_0, \Sigma_0)$ 
4: else
5:   Draw  $\{x_i^{\text{test}}\}_{i=1}^{n_{\text{test}}} \sim \Pi(\{x_i\}_{i=1}^{n-1}, \lambda)$ 
6: end if
7:  $j^* \leftarrow \arg \min_{j \in \{1 \dots n_{\text{test}}\}} \log \mathcal{E}_{\infty, P}(\{x_i\}_{i=1}^{n-1} \cup \{x_j^{\text{test}}\})$ 
8:  $x_n \leftarrow x_{j^*}^{\text{test}}$ 
    
```

---

where  $\mathcal{A}$  is the Langevin Stein operator defined in the main text; i.e.  $\mathcal{A}g = \frac{1}{\tilde{p}} \nabla \cdot (\tilde{p}g)$ . The direction of fastest descent

$$g^*(\cdot) := \arg \max_{g \in B(\mathcal{K}^d)} - \left. \frac{d}{d\epsilon} \text{KL}((S_g)_\# Q \| P) \right|_{\epsilon=0}$$

has a closed form with  $j$ th coordinate equal to (in informal notation)

$$g_j^*(\cdot; Q) = \int_{\mathcal{X}} (\partial_{x^j} + \partial_{x^j} \log \tilde{p}) k(x, \cdot) dQ(x).$$

To obtain a practical algorithm, (Liu & Wang, 2016) proposed to discretise this dynamics in both space  $\mathcal{X}$ , through the use of an empirical approximation to  $Q$ , and in time, through the use of a fixed and positive time step  $\epsilon > 0$ . The result is a sequence of empirical measures based on point sets  $\{x_i^{(m)}\}_{i=1}^n$  for  $m \in \mathbb{N}$ , where in what follows we have re-purposed superscripts to denote iteration number instead of coordinate. Thus, given an initialisation  $\{x_i^{(0)}\}_{i=1}^n$  of the points, at iteration  $m \geq 1$  of the algorithm we update

$$x_i^{(m)} = x_i^{(m-1)} + \epsilon g^*(x_i^{(m-1)}; Q_n^m), \quad Q_n^m := \frac{1}{n} \sum_{i=1}^n \delta_{x_i^{(m-1)}}$$

in parallel at a computational cost of  $O(n)$ . The output is the empirical measure  $Q_n^m$  and positive theoretical results on the convergence of  $Q_n^m$  to  $P$  is at present an open research question, though continuum versions of SVGD have now been studied (e.g.) (Liu, 2017; Lu et al., 2018). In addition, recent work has sought to improve the empirical performance of SVGD by the use of quasi-Newton methods; see (Detommaso et al., 2018). However, for all experiments in this paper we employed the original formulation of SVGD due to (Liu & Wang, 2016).

#### A.6.2. GAUSSIAN MIXTURE MODEL

SP was implemented based on the same adaptive Monte Carlo search procedure described above in Alg. 1. To ensure a fair comparison, the number of search points was taken equal to  $m_j$ , the length of the Markov chain used in SP-MCMC.

#### A.6.3. IGARCH MODEL

SP and MED were each implemented based on the same adaptive Monte Carlo search procedure described above in Alg. 1. To ensure a fair comparison, in each case the number of search points was taken equal to  $m_j$ , the length of the Markov chain used in SP-MCMC.

For SVGD the size  $n$  of the point set must be pre-specified. In order to ensure a fair comparison with SP-MCMC we considered a point set of size  $n = 1000$ , which is identical to the size of point set that are ultimately produced by SP-MCMC during the course of this experiment. The step size  $\epsilon$  was hand-tuned to optimise the performance of SVGD in our experiment. The point set was initialised for SVGD by sampling each point independently from  $\text{Unif}((0.002, 0.04) \times (0.05, 0.2))$ . The step-size  $\epsilon$  for SVGD was set using Adagrad, as in (Liu & Wang, 2016), with *master step size* 0.001 and *momentum* 0.9.

The resulting point sets are visualised in Fig. S1.



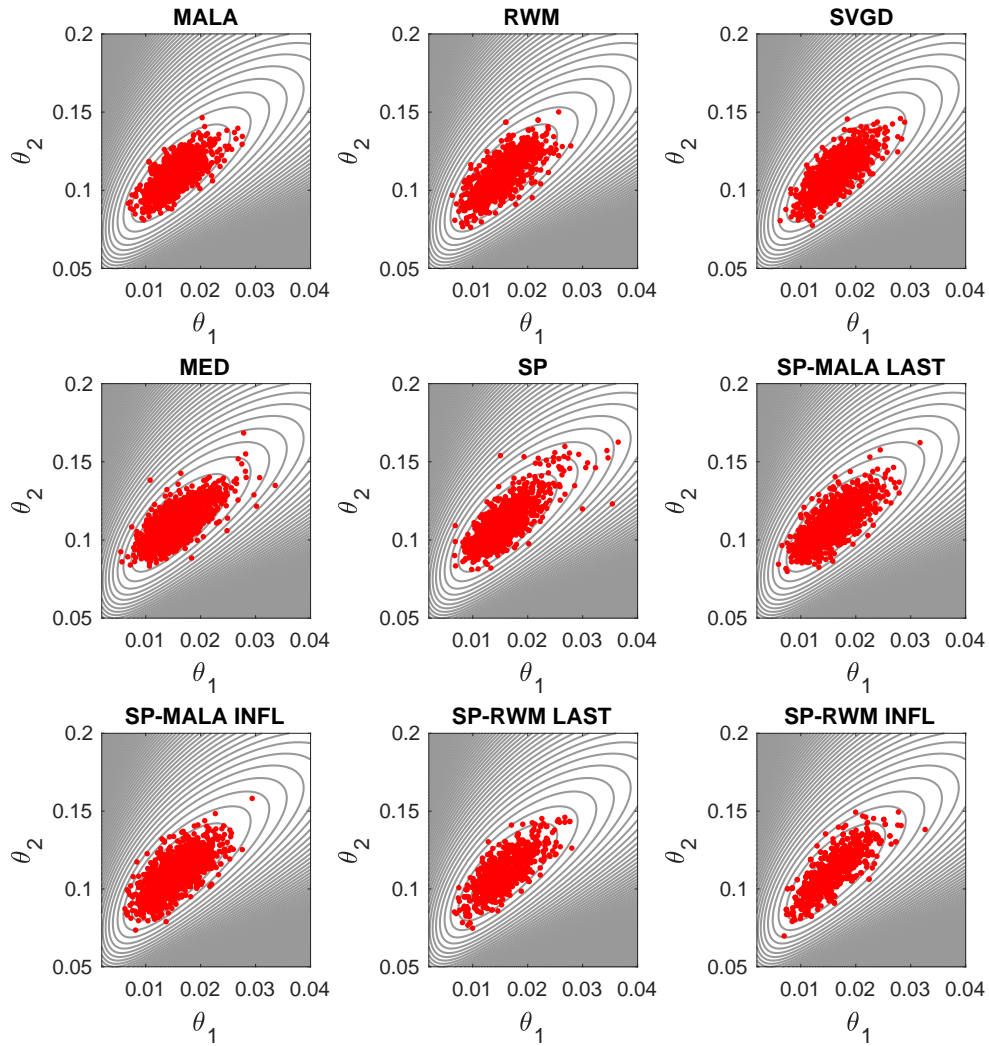

Figure S1. Quantisation in the IGARCH experiment. For the IGARCH experiment, we display point sets of size  $n = 1000$  produced by each of MCMC, SP, MED, SVGD and SP-MCMC, as described in Section 4.3 and Appendix A.6.3.

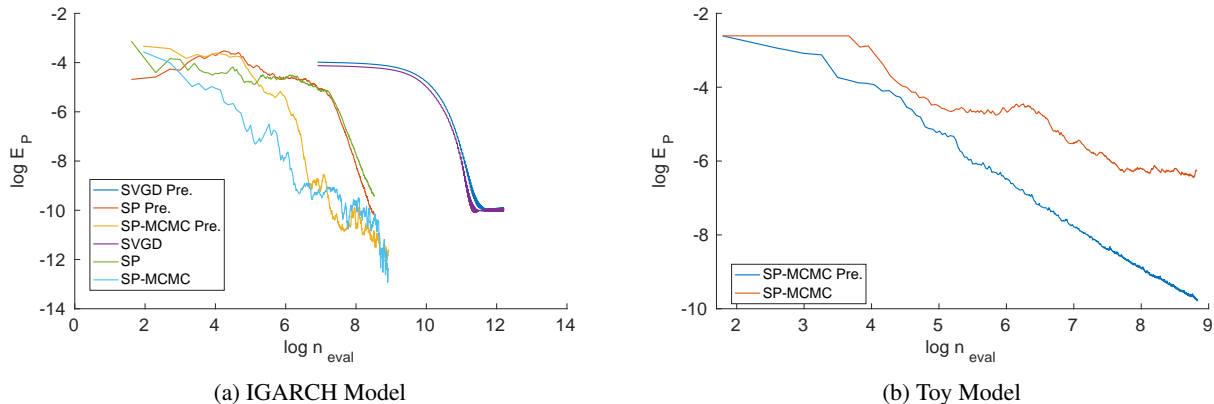

Figure S2. Assessing the contribution of the preconditioner kernel. For the IGARCH experiment (left), we compared the performance of SP, SVGD and SP-MCMC each with and without a preconditioner matrix  $\Lambda$  being used. In addition, a toy model (right) was explored for which the natural scale of the state vector  $x$  was not commensurate with the naive choice of preconditioner matrix  $\Lambda = I$ . As in Fig. 3 in the main text, each method produced an empirical measure  $\frac{1}{n} \sum_{i=1}^n \delta_{x_i}$  whose distance to the target  $P$  was quantified by the energy distance  $E_P$ . The computational cost was quantified by the number  $n_{\text{eval}}$  of times either  $\tilde{p}$  or its gradient were evaluated.

#### A.6.4. PERFORMANCE OF THE PRECONDITIONER KERNEL

The performance of the preconditioner kernel in (6) was explored by comparing the default case  $\Lambda = I$  (i.e. where a preconditioner is not used) to the case where  $\Lambda$  is estimated based on a short run of MCMC. For this comparison we first considered the IGARCH experiment described in Sec. 4.3. This is expected to prove to be a challenging example for a preconditioner, in the sense the posterior is already unimodal and fairly well-conditioned. To test this hypothesis, the experiment reported in the main text was performed for both selections of  $\Lambda$  and the results are reported in Fig. S2 (left). It can indeed be seen that the use of a preconditioner does not lead to a gain in performance in this case; however, and importantly, performance does not get *worse* as a result of the preconditioner being used.

To explore a scenario where the preconditioner demonstrates a benefit, we considered a toy model  $P = \mathcal{N}(0, \sigma^2 I)$  with  $\sigma = 0.01$ . In this case the naive choice of  $\Lambda = I$  was compared to the proposed approach of taking  $\Lambda$  to be a sample-based approximation to the covariance of  $P$ . It is seen in Fig. S2 (right) that the preconditioner kernel out-performed the naive choice of  $\Lambda = I$  for this model, emphasising the need to ensure  $\Lambda$  is commensurate with the scale of the state variable  $x$  in general.

An important point is that there is in general a computational cost associated with building an appropriate preconditioner matrix  $\Lambda$  as just described. This is not explicitly accounted for in the experimental results that we report (i.e. not included in the total  $n_{\text{eval}}$ ). To address this point, and to demonstrate that SP-MCMC can prove to be effective in the absence of this computational overhead, we refer the reader to the ODE example in Secs. 4.4 and A.6.6, where a simple preconditioner matrix  $\Lambda \propto I$  was used and strong results were nevertheless obtained.

#### A.6.5. REMOVAL OF “BAD” POINTS

In this section we explored the implications of Remark 3 in the main text, which proposed to remove “bad” points from the current point set. This can be motivated by analogous strategies, known as *away steps*, explored in the Frank-Wolfe literature (e.g. Lacoste-Julien & Jaggi, 2015; Freund et al., 2017). An approach was considered such that, if the current point set in SP-MCMC is  $\{x_i\}_{i=1}^{j-1}$ , then in addition to identifying a possible next point  $x_j$ , we also identify a “bad” point  $x_{i^*}$  that minimises  $D_{\mathcal{K}_0, P}(\{x_i\}_{i=1}^{j-1} \setminus \{x_{i^*}\})$ . Then we compare the two quantities

$$\begin{aligned} \Delta_{\text{good}} &:= D_{\mathcal{K}_0, P}(\{x_i\}_{i=1}^{j-1}) - D_{\mathcal{K}_0, P}(\{x_i\}_{i=1}^j) \\ \Delta_{\text{bad}} &:= D_{\mathcal{K}_0, P}(\{x_i\}_{i=1}^{j-1}) - D_{\mathcal{K}_0, P}(\{x_i\}_{i=1}^{j-1} \setminus \{x_{i^*}\}). \end{aligned}$$

If either  $j = 1$  or  $\Delta_{\text{good}} > \Delta_{\text{bad}}$ , then the new point  $x_j$  is included in the point set, so that the updated point set is  $\{x_i\}_{i=1}^j$ . Otherwise we remove the “bad” point from the point set, so that the update point set is  $\{x_i\}_{i=1}^{j-1} \setminus \{x_{i^*}\}$ . As such, with this approach the iteration number of the SP-MCMC algorithm is no longer identical to the size of the point set and the

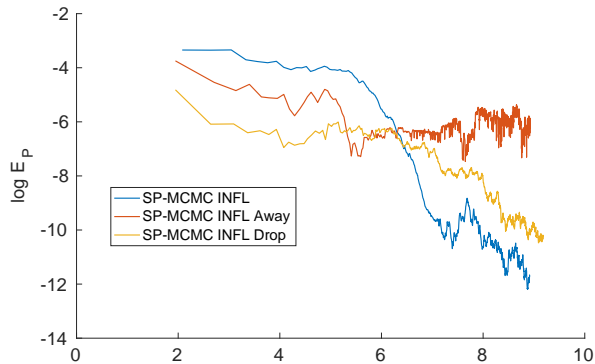

Figure S3. Assessing the benefit of removing “bad” points. For the IGARCH experiment, we compared the performance of SP-MCMC with and without *away steps* (“Away”) being used. In addition a simpler procedure, whereby the “current worst” point is occasionally dropped (“Drop”), was considered. As in Fig. 3 in the main text, each method produced an empirical measure  $\frac{1}{n} \sum_{i=1}^n \delta_{x_i}$  whose distance to the target  $P$  was quantified by the energy distance  $E_P$ . The computational cost was quantified by the number  $n_{\text{eval}}$  of times either  $\tilde{p}$  or its gradient were evaluated.

computational cost required to obtain a size  $n$  point set may be increased relative to vanilla SP-MCMC. However, it is possible that this approach can lead to improved performance at the quantisation task.

To empirically test this approach, we revisit the IGARCH experiment in Sec. 4.3 of the main text. The SP-MCMC method was implemented with the `INFL` criterion and with  $m_j = 5$ , identical to the experiment shown in the main text. Results comparing the impact of removing “bad points” in the manner described above are shown in Fig. S3. Interestingly, this was not seen to work well because too frequently a point would be removed, leading to sets containing only a small number of points. To investigate further, we considered an alternative approach wherein the “current worst” point would occasionally be removed. Results are also depicted in Fig. S3, based on a “dropping” rate of 25%. This led to larger point sets and an improved performance as measured by  $E_P$ . However, neither strategy considered outperformed the default approach where points were never removed.

#### A.6.6. GOODWIN OSCILLATOR

The *Goodwin oscillator* (Goodwin, 1965) is a dynamical model of oscillatory enzymatic control. This kinetic model, specified by a system of  $q$  ODEs, describes how a negative feedback loop between protein expression and mRNA transcription can induce oscillatory dynamics at a cellular level. In this work we considered Bayesian parameter estimation for two such models; a simple model with no intermediate protein species ( $q = 2$ ) and a more complex model with six intermediate protein species ( $q = 8$ ). The experimental protocol below follows that used in the earlier work of (Calderhead & Girolami, 2009; Oates et al., 2016).

The Goodwin oscillator with  $q$  species is given by

$$\begin{aligned} \frac{du_1}{dt} &= \frac{a_1}{1 + a_2 u_q^\rho} - \alpha u_1 \\ \frac{du_2}{dt} &= k_1 u_1 - \alpha u_2 \\ &\vdots \\ \frac{du_q}{dt} &= k_{q-1} u_{q-1} - \alpha u_q. \end{aligned} \tag{37}$$

The variable  $u_1$  represents the concentration of mRNA and  $u_2$  represents its corresponding protein product. The variables  $u_3, \dots, u_q$  represent intermediate protein species that facilitate a cascade of enzymatic activation leading, ultimately, to a negative feedback, via  $u_q$ , on the rate at which mRNA is transcribed. The Goodwin oscillator permits oscillatory solutions only when  $\rho > 8$ . Following (Calderhead & Girolami, 2009; Oates et al., 2016) we set  $\rho = 10$  as a fixed parameter. The solution  $u(t)$  of this dynamical system depends upon synthesis rate constants  $a_1, k_1, \dots, k_{q-1}$  and degradation rate

constants  $a_2, \alpha$ . Thus the parameter vector  $\theta = [a_1, a_2, k_1, \dots, k_{q-1}, \alpha] \in [0, \infty)^{q+2}$  and a  $q$ -variable Goodwin model has  $d = q + 2$  uncertain parameters to be inferred.

For this experiment we followed (Oates et al., 2016) and considered a realistic setting where only mRNA and protein product are observed, corresponding to  $g(u) = [u_1, u_2]$ . For the initial condition we took  $u_0 = [0, \dots, 0]$  and for the measurement noise we took  $\sigma = 0.1$ , both considered known and fixed. Data  $\{y_i\}_{i=1}^{40}$  were generated using  $a_1 = 1, a_2 = 3, k_1 = 2, k_2, \dots, k_{q-1} = 1, \alpha = 0.5$ , as in (Oates et al., 2016). Thus the likelihood function for these data has the Gaussian form

$$p(y|\theta) = \frac{1}{(2\pi\sigma^2)^{20}} \exp\left(-\frac{1}{2\sigma^2} \sum_{i=1}^{40} \|y_i - g(u(t_i))\|_2^2\right).$$

To set up the Bayesian inferential framework, each parameter  $\theta_i$  was assigned an independent  $\Gamma(2, 1)$  prior belief. Note that, in order to ensure that boundary conditions in Sec. 2.1 were satisfied, we subsequently worked with the log-transformed parameters  $x = \log(\theta) \in \mathbb{R}^d$ , identifying the posterior distribution of  $x$  with the target  $P$  in our assessment.

In order to obtain the gradient  $\nabla \log \tilde{p}$  it is required to differentiate the solution  $u(t_i)$  of the ODE with respect to the parameters  $x$  at each time point  $i \in \{1, \dots, 40\}$ . Of course, from the chain rule it is sufficient in what follows to consider differentiation of  $u(t_i)$  with respect to  $\theta$ . To this end, define the *sensitivities*  $S_{j,k}^i := \frac{\partial u_k}{\partial \theta_i}(t_j)$ , and note that these satisfy

$$\frac{d}{dt} S_{j,k}^i = \frac{\partial f_k}{\partial \theta_i} + \sum_{l=1}^q \frac{\partial f_k}{\partial u_l} S_{j,l}^i \quad (38)$$

where  $\frac{\partial u_k}{\partial \theta_i} = 0$  at  $t = 0$ . The sensitivities can therefore be numerically computed by augmenting the state vector  $u$  of the original ODE to include the  $S_{j,k}^i$ . In this work the `ode45` solver in MATLAB was used to numerically solve this augmented ODE.

For SP-MCMC, we found that construction of a suitable preconditioner matrix  $\Lambda$  was challenging due to the computational cost associated with each forward-solve of the ODE. To this end, we simply selected  $\Lambda = 0.3I$  for the case  $d = 4$  and  $\Lambda = 0.15I$  for the case  $d = 10$ . The same kernel  $k$ , with this choice of  $\Lambda$ , was employed for each of SP, SP-MCMC and SVGD.

SP and MED were each implemented based on the same adaptive Monte Carlo search procedure described above in Alg. 1. To ensure a fair comparison, in each case the number of search points was taken equal to  $m_j$ , the length of the Markov chain used in SP-MCMC. The methods were run to produce a point set of size  $n = 300$ .

For SVGD the size  $n$  of the point set must be pre-specified. In order to ensure a fair comparison with SP-MCMC we considered a point set of size  $n = 300$ , which is identical to the size of point set that are ultimately produced by SP-MCMC during the course of this experiment. The step size  $\epsilon$  was hand-tuned to optimise the performance of SVGD in our experiment. To initialise SVGD, a point set was drawn independently at random from  $\text{Uniform}(\theta^* - 0.5 \times 1, \theta^* + 0.5 \times 1)$ , where  $1 = [1, \dots, 1]$  where  $\theta^*$  is the data-generating value of the parameter vector. The step-size  $\epsilon$  for SVGD was set using Adagrad, as in (Liu & Wang, 2016), with *master step size* 0.005 and *momentum* 0.9.
